# Supplementary material for: Organ-specific cholesterol metabolic aberration fuels liver metastasis of colorectal cancer
Source: PubMed Central journal article supplement (PMC8120208; doi:10.7150/thno.55609), 2021-04-27
Supplement: thnov11p6560s1.pdf [file thnov11p6560s1.pdf]

## Supplementary Data

**Table S1. Clinicopathological information of CRC patients with liver metastasis**

| Case | Sex | Age (yrs) | Location                          | Number of LM | Histological grade | TNM stage     |
|------|-----|-----------|-----------------------------------|--------------|--------------------|---------------|
| 1    | M   | 57        | Sigmoid colon                     | 1            | II                 | pT3N1aM1a IVA |
| 2    | F   | 44        | Ascending colon                   | 1            | II                 | pT3N2aM1a IVA |
| 3    | M   | 62        | Rectum                            | 1            | II                 | pT3N1aM1a IVA |
| 4    | M   | 52        | Rectum                            | 1            | III                | pT3N1aM1a IVA |
| 5    | F   | 43        | Decending colon;<br>Sigmoid colon | 3            | III                | pT3N1aM1a IVA |
| 6    | F   | 53        | Ascending colon                   | 2            | II                 | pT3N2aM1a IVA |
| 7    | M   | 64        | Ascending colon                   | 1            | II                 | pT3N1aM1a IVA |
| 8    | F   | 27        | Rectum                            | 1            | II                 | pT3N1aM1a IVA |
| 9    | M   | 46        | Decending colon                   | 1            | II                 | pT3N1aM1a IVA |
| 10   | F   | 71        | Ascending colon                   | 1            | II                 | pT3N2aM1a IVA |
| 11   | M   | 49        | Ascending colon                   | 1            | III                | pT3N1aM1a IVA |
| 12   | M   | 79        | sigmoid colon                     | 1            | II                 | pT3N2aM1a IVA |
| 13   | F   | 56        | Ascending colon                   | 1            | III                | pT3N2aM1a IVA |
| 14   | F   | 35        | Ascending colon                   | 1            | II                 | pT3N1aM1a IVA |
| 15   | M   | 58        | sigmoid colon                     | 7            | II                 | pT3N2aM1a IVA |
| 16   | M   | 51        | sigmoid colon                     | 1            | II                 | pT3N2aM1a IVA |
| 17   | M   | 31        | Rectum                            | 3            | II                 | pT3N2aM1a IVA |

Abbreviation: LM, liver metastasis.

**Table S2. Sequences of primer sets used in quantitative RT-PCR**

| Gene           | Gene Bank Accession NO. | Sequence(5' to 3')       |
|----------------|-------------------------|--------------------------|
| SREBP2         | NM_004599               | CTCACCTTCCTGTGCCTCTC     |
|                |                         | AGGCATCATCCAGTCAAACC     |
| HMGCR          | NM_001130996            | GTCATTCCAGCCAAGGTTGT     |
|                |                         | CATGGCAGAGCCCACTAAAT     |
| HMGCS          | NM_001098272            | GATGGACGGTATGCCCTGGTAT   |
|                |                         | CTCCACCTGTAGGTCTAGCATG   |
| SRB1           | NM_001082959.2          | GCTCGGAGAGCGACTACATC     |
|                |                         | CCACATGATCTCACCCACAG     |
| LDLR           | NM_001010978            | GCTTGTCTGTCACCTGCAAA     |
|                |                         | AACTGCCGAGAGATGCACTT     |
| ACAT1          | NM_000019               | GATGAAGGAAGGCTGGTGC      |
|                |                         | GGAAGCTGGTGGCAGTGTAT     |
| ACAT2          | NM_005891               | CATGCTGCTGTCATCTTCT      |
|                |                         | ACTGCGGAGACCAGGAACA      |
| ABCA1          | NM_080282               | AACAGTTTGTGGCCCTTTTG     |
|                |                         | AGTTCCAGGCTGGGGTACTT     |
| ABCG1          | NM_207174               | ACGCAGTTCTGCATCCTCTT     |
|                |                         | CGGAGTTGCTCAAGACCTTC     |
| CYP7A1         | NM_000780               | CACCTTGAGGACGGTTCCTA     |
|                |                         | CGATCCAAAGGGCATGTAGT     |
| CYP27A1        | NM_000784               | AAGCGATACCTGGATGGTTG     |
|                |                         | TGTTGGATGTCGTGTCCACT     |
| $\beta$ -ACTIN | NM_001101               | GAGCTACGAGCTGCCTGACG     |
|                |                         | CCTAGAAGCATTGCGGTGG      |
| ATGL           | NM_020376               | GGCTTCCTCGGCGTCTACTA     |
|                |                         | TTTACCAGGTTGAAGGAGGGG    |
| LIPE           | NM_005357               | TCAGTGTCTAGGTCAGACTGG    |
|                |                         | AGGCTTCTGTTGGGTATTGGA    |
| PLPP1          | NM_003711               | GGCAGGTTGTCCTTCTATTTCAG  |
|                |                         | CAGTGTGGGGCGTAAGAGT      |
| MGAT1          | NM_001114619            | GTGCATAACCGGCCCAATA      |
|                |                         | ACGAGGACGTTGTCAATTCCC    |
| AGPAT6         | NM_178819               | GGTATCCGCAAACCTCTACATGAA |
|                |                         | CCACTTCGACGAATCTCTTTGA   |
| MGLL           | NM_001003794            | ATGCCAGAGGAAAGTTCCCC     |
|                |                         | CGTCTGCATTGACCAGGTG      |
| PFK            | NM_002626               | GCATGGGTATCTACGTGGGG     |

|      |              |                         |
|------|--------------|-------------------------|
|      |              | CTCTGCGATGTTTGAGCCTC    |
| PGK1 | NM_000291    | GAACAAGGTAAAGCCGAGCC    |
|      |              | GTGGCAGATTGACTCCTACCA   |
| PKM  | NM_182471    | ATAACGCCTACATGGAAAAGTGT |
|      |              | TAAGCCCATCATCCACGTAGA   |
| G6PD | NM_000402    | CGAGGCCGTCACCAAGAAC     |
|      |              | GTAGTGGTCGATGCGGTAGA    |
| ENO2 | NM_001975    | AGCCTCTACGGGCATCTATGA   |
|      |              | TTCTCAGTCCCATCCA ACTCC  |
| HK1  | NM_033498    | GCTCTCCGATGAAACTCTCATAG |
|      |              | GGACCTTACGAATGTTGGCAA   |
| HK2  | NM_000189    | GAGCCACCACTCACCTACT     |
|      |              | CCAGGCATTCGGCAATGTG     |
| LDHA | NM_001165415 | ATGGCAACTCTAAAGGATCAGC  |
|      |              | CCAACCCCAACA ACTGTAATCT |

**Table S3. shRNA targeting sequence**

| <b>Target gene</b> | <b>shRNA number</b> | <b>Sequence</b>       |
|--------------------|---------------------|-----------------------|
| SREBP2             | shRNA#1             | GCCCTCTATTGGATGATGCAA |
|                    | shRNA#2             | GCAACAACAGACGGTAATGAT |
|                    | shRNA#3             | GACCTGAAGATCGAGGACTTT |

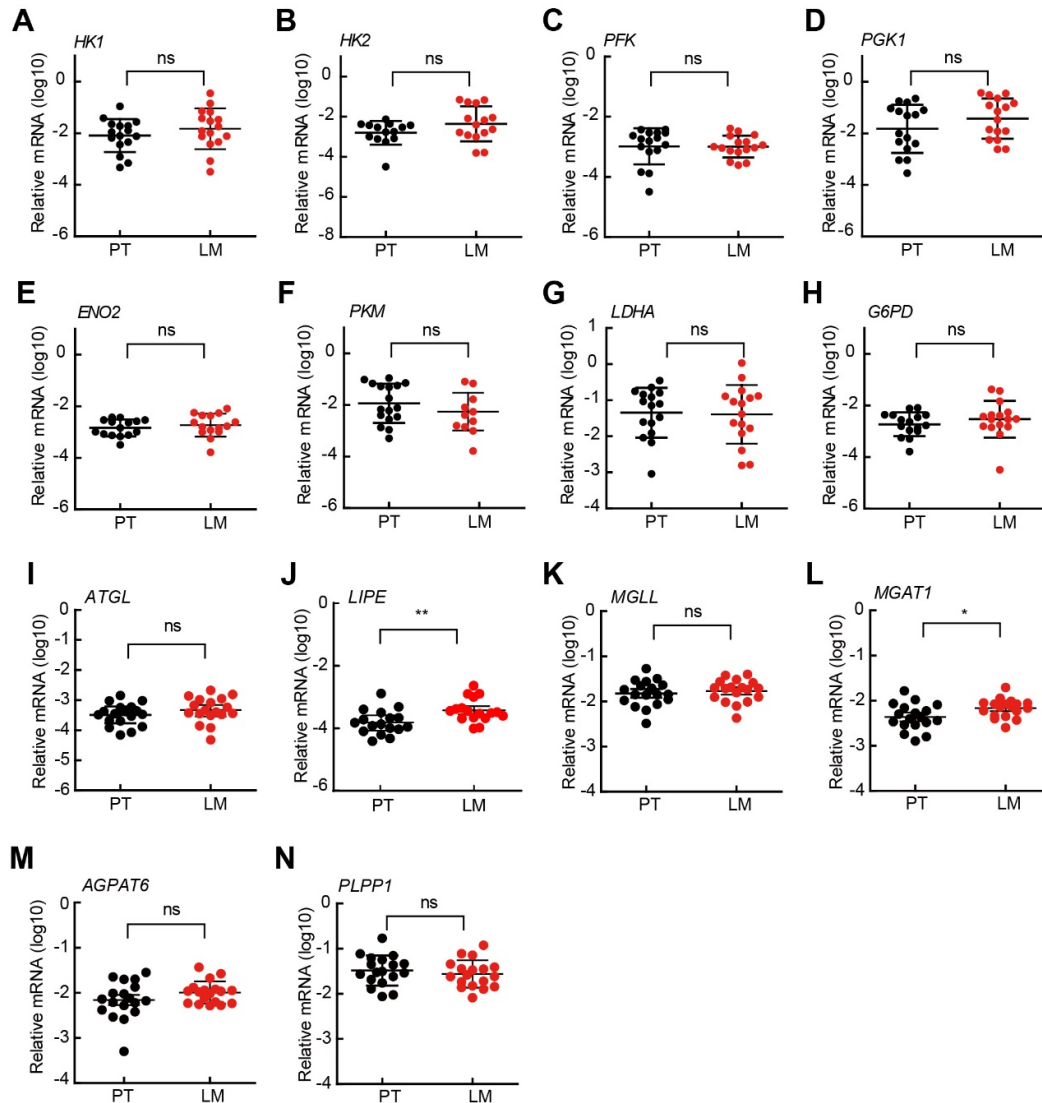

**Figure S1. Expression of key genes involved in glycometabolism and triglyceride metabolism in liver metastasis of colorectal cancer**

**A-H,** Quantitative RT-PCR analysis of mRNA levels for genes involved in glycometabolism and triglyceride metabolism in 17 paired samples from patients diagnosed with primary colorectal cancer (CRC) and liver metastasis. Primary tumor tissues (PT) and paired liver metastasis tissues (LM). Data are shown as mean  $\pm$  SEM after log transformation ( $n = 17$ ). Each dot represents the mean of relative mRNA level ( $\log_{10}$ ) in triplicates for the indicated gene in each tissue sample.

**I-N,** Quantitative RT-PCR analysis of mRNA levels for triglyceride metabolism-related genes in 17 paired samples from patients diagnosed with primary colorectal

cancer and liver metastasis. Data are shown as mean  $\pm$  SEM after log transformation (n = 17). Each dot represents the mean of relative mRNA levels (log<sub>10</sub>) in triplicates for the indicated gene in each tissue sample.

Significance was determined by a two-tailed paired *t*-test (A-N). \*P < 0.05, \*\*P < 0.01, \*\*\*P < 0.001, ns, not significant.

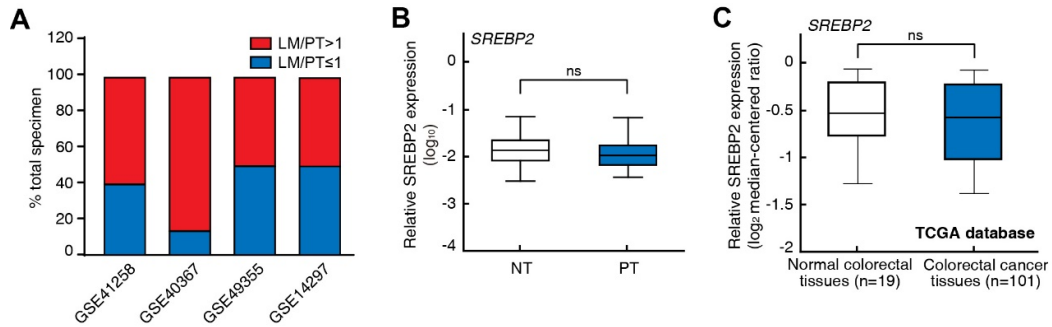

**Figure S2. SREBP2 expression in CRC tissues**

**A**, Relative SREBP2 expression in paired samples of PTs and LMs from 4 GEO datasets. The relative SREBP2 expressions in PTs and LMs from 4 GEO datasets are calculated by dividing the intensity of *SREBP2* to that of internal control gene *GAPDH*, and were then used to calculate the LM/PT ratio.

**B**, Relative SREBP2 mRNA levels in PTs and paired adjacent non-tumorous colorectal tissues (NTs). Data are shown as mean  $\pm$  SEM after log transformation (n = 13). Triplicates conducted in each tissue sample.

**C**, Relative SREBP2 mRNA levels in PTs and NTs from TCGA database.

For (**B**) and (**C**), Significance was determined by a two-tailed paired *t*-test. \*P < 0.05, \*\*P < 0.01, \*\*\*P < 0.001, ns, not significant.



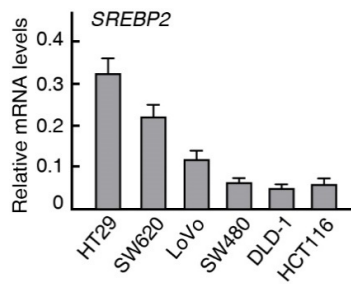

**Figure S3. The mRNA levels of SREBP2 in different colon cancer cell lines.**

RT-qPCR analysis of mRNA levels for SREBP2 involved in cholesterol biosynthesis pathway in 6 colon cancer cell lines, including HT29, SW620, LoVo, SW480, DLD-1 and HCT116. Representative results from at least three independent experiments are shown. Data are shown as mean  $\pm$  SD of triplicate experiments.

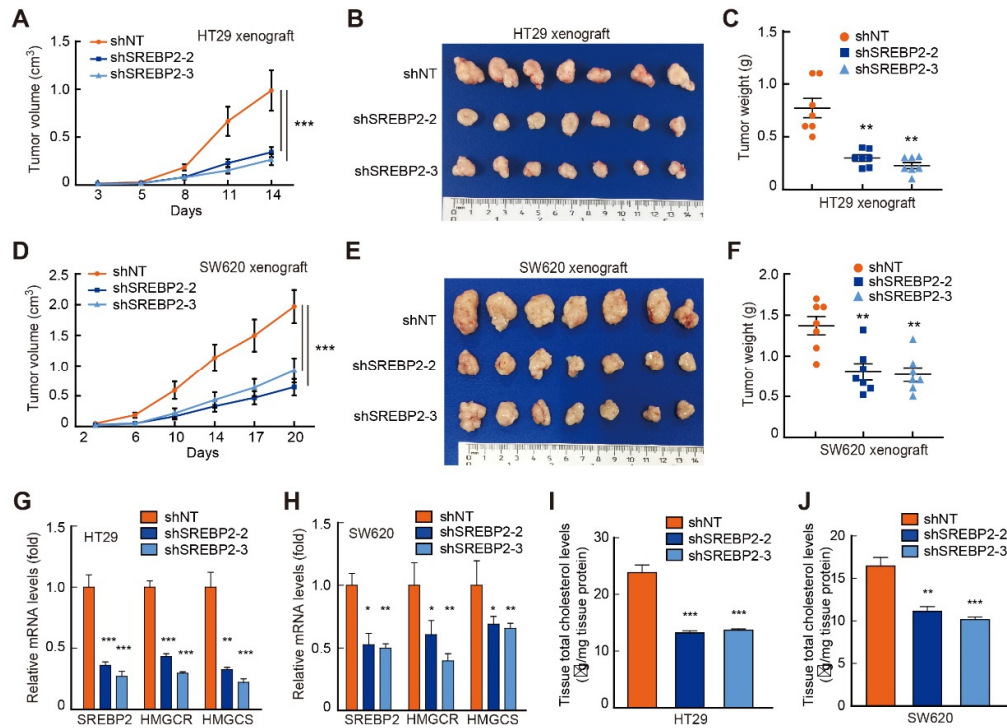

**Figure S4. Knockdown of SREBP2 inhibits CRC tumor growth *in vivo***

**A-F**, Effects of SREBP2 knockdown on CRC xenograft tumor growth. Different HT29 or SW620 stable cell lines were used to establish xenograft tumors in nude mice. Tumor volumes were assessed on the indicated days (**A** and **D**) and tumors were dissected for photo (**B** and **E**) and weight (**C** and **F**). Data are shown as mean  $\pm$  SEM. Significance was determined by two-way ANOVA ( $n = 7$ ) (**A** and **D**) or one-way ANOVA ( $n = 7$ ) (**C** and **F**).

**G-J**, Confirmation of *SREBP2* knockdown in HT29 or SW620 xenograft tumors.

The expression of *SREBP2*, *HMGCR* and *HMGCS* (**G-H**) and total cholesterol content (**I** and **J**) were determined in HT29 and SW620 xenograft tumors.

Representative results from at least three independent experiments are shown. Data are shown as mean  $\pm$  SEM of triplicate experiments. Significance was determined by one-way ANOVA. \*\* $P < 0.01$ , \*\*\* $P < 0.001$ .

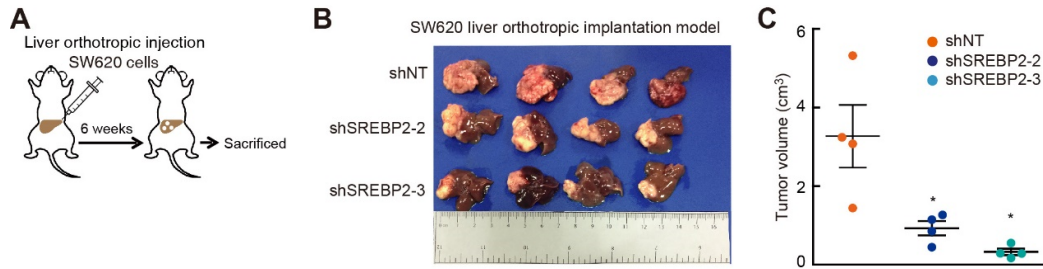

**Figure S5. Knockdown of SREBP2 inhibits CRC liver metastasis *in vivo***

A-C, The effect of SREBP2 silencing on CRC liver metastasis in liver orthotopic injection model. Different SW620 stable cell lines were injected into liver of mice (A). At the end of the experiment, liver metastases were taken photos (B), and were dissected for assessing tumor volume (C). Data are shown as mean  $\pm$  SEM (n = 4). Significance was determined by one-way ANOVA. \*P < 0.05.

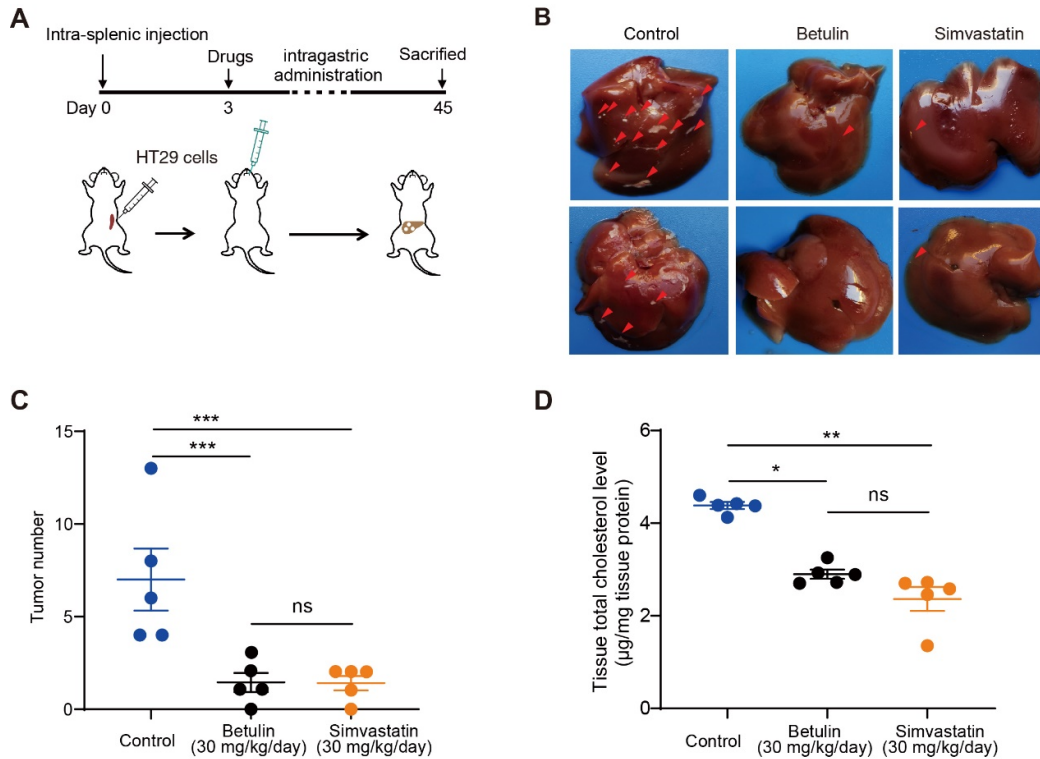

**Figure S6. Cholesterol biosynthesis pathway is required for CRC liver metastasis.**

The effect of betulin and simvastatin on CRC liver metastasis in intrasplenic injection model. Schematic diagram of intrasplenic injection mice model was presented in (A). Representative pictures of group Con/Betulin/Simvastatin, Red arrow indicates liver metastases (B) and metastatic lesion numbers were counted (C), and liver metastases tissues were dissected for assessing total cholesterol (D). Data are shown as mean  $\pm$  SEM (n = 5). Significance was determined by one-way ANOVA. \*P < 0.05, \*\*P < 0.01, \*\*\*P < 0.001.

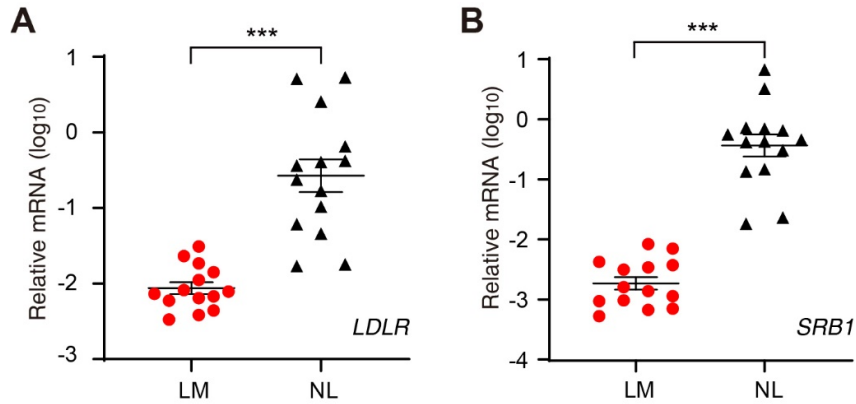

**Figure S7. Evaluation of the cholesterol biosynthesis and influx pathway in CRC liver metastasis tissue (LM) and normal liver tissue (NL)**

Quantitative RT-PCR analysis of mRNA levels for LDLR (A) and SR-B1 (B) in LM and paired NL. Data are shown as mean  $\pm$  SEM after log transformation ( $n = 14$ ).

Each dot represents the mean of relative mRNA levels (log<sub>10</sub>) in triplicates for the indicated gene in each tissue sample.

Significance was determined by a two-tailed paired  $t$ -test. \*\*\* $P < 0.001$ .
